# Supplementary figures and images for: Progress in applying CRISPR in pathogen detection
Source: PeerJ journal article supplement (doi:10.7717/peerj-achem.36), 2025-09-17

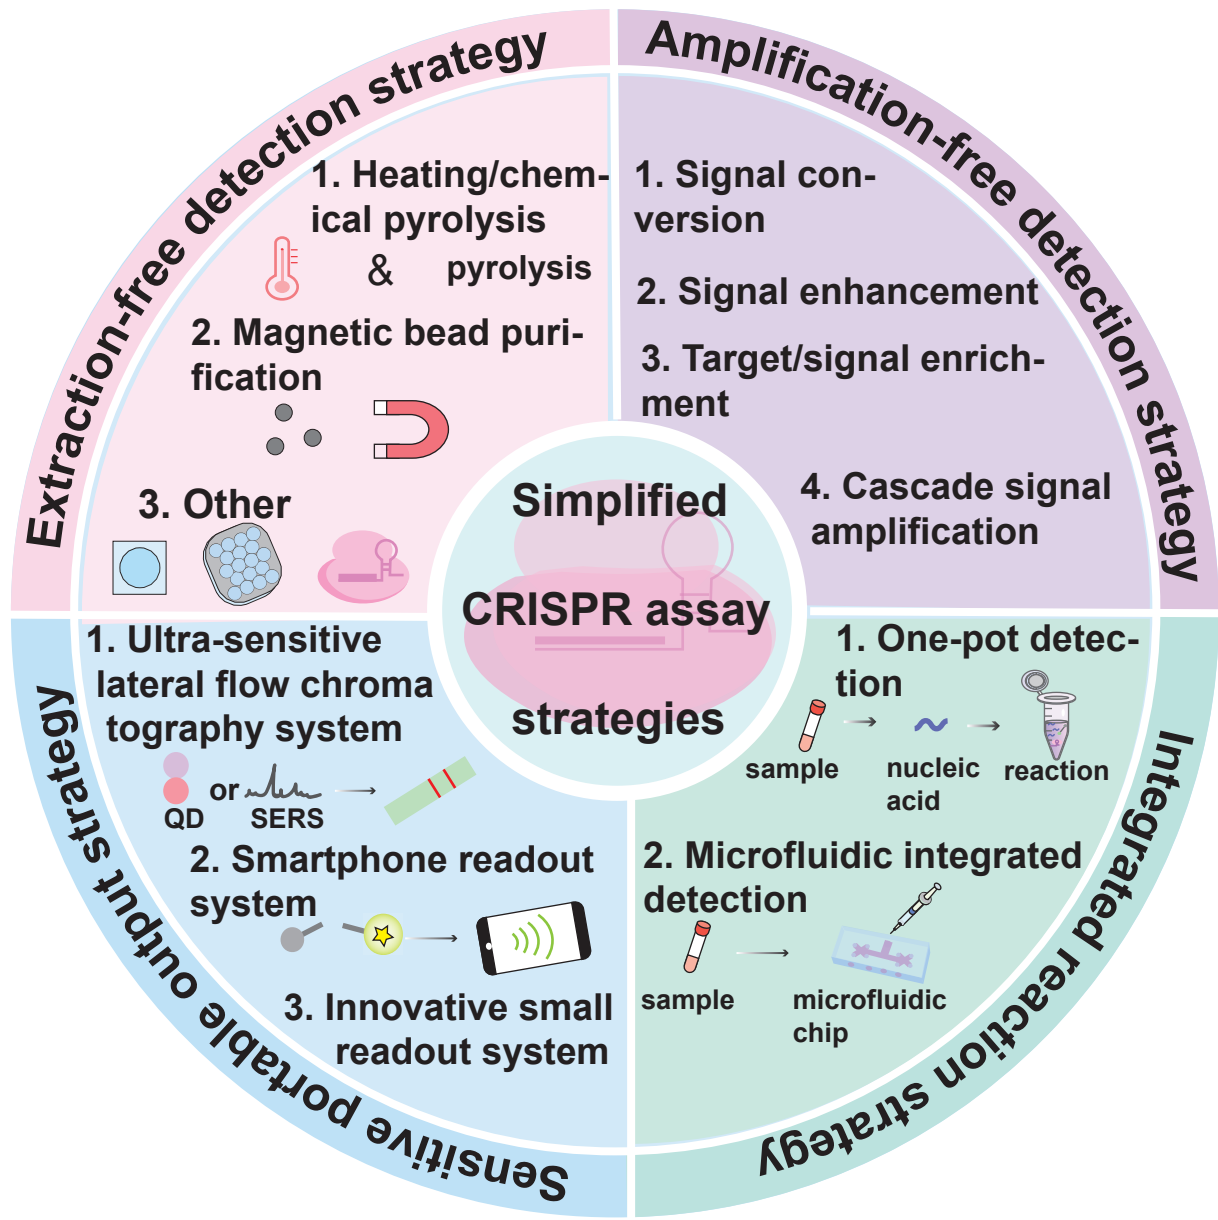

Supplement: Graphical_abstract.pdf [file Graphical_abstract.pdf]
